# Supplementary material
Source: publisher figshare collection journal article supplement (https://aacr.figshare.com/articles/dataset/_/22495033)
Supplement: Supplementary file 1 [file 39952096]

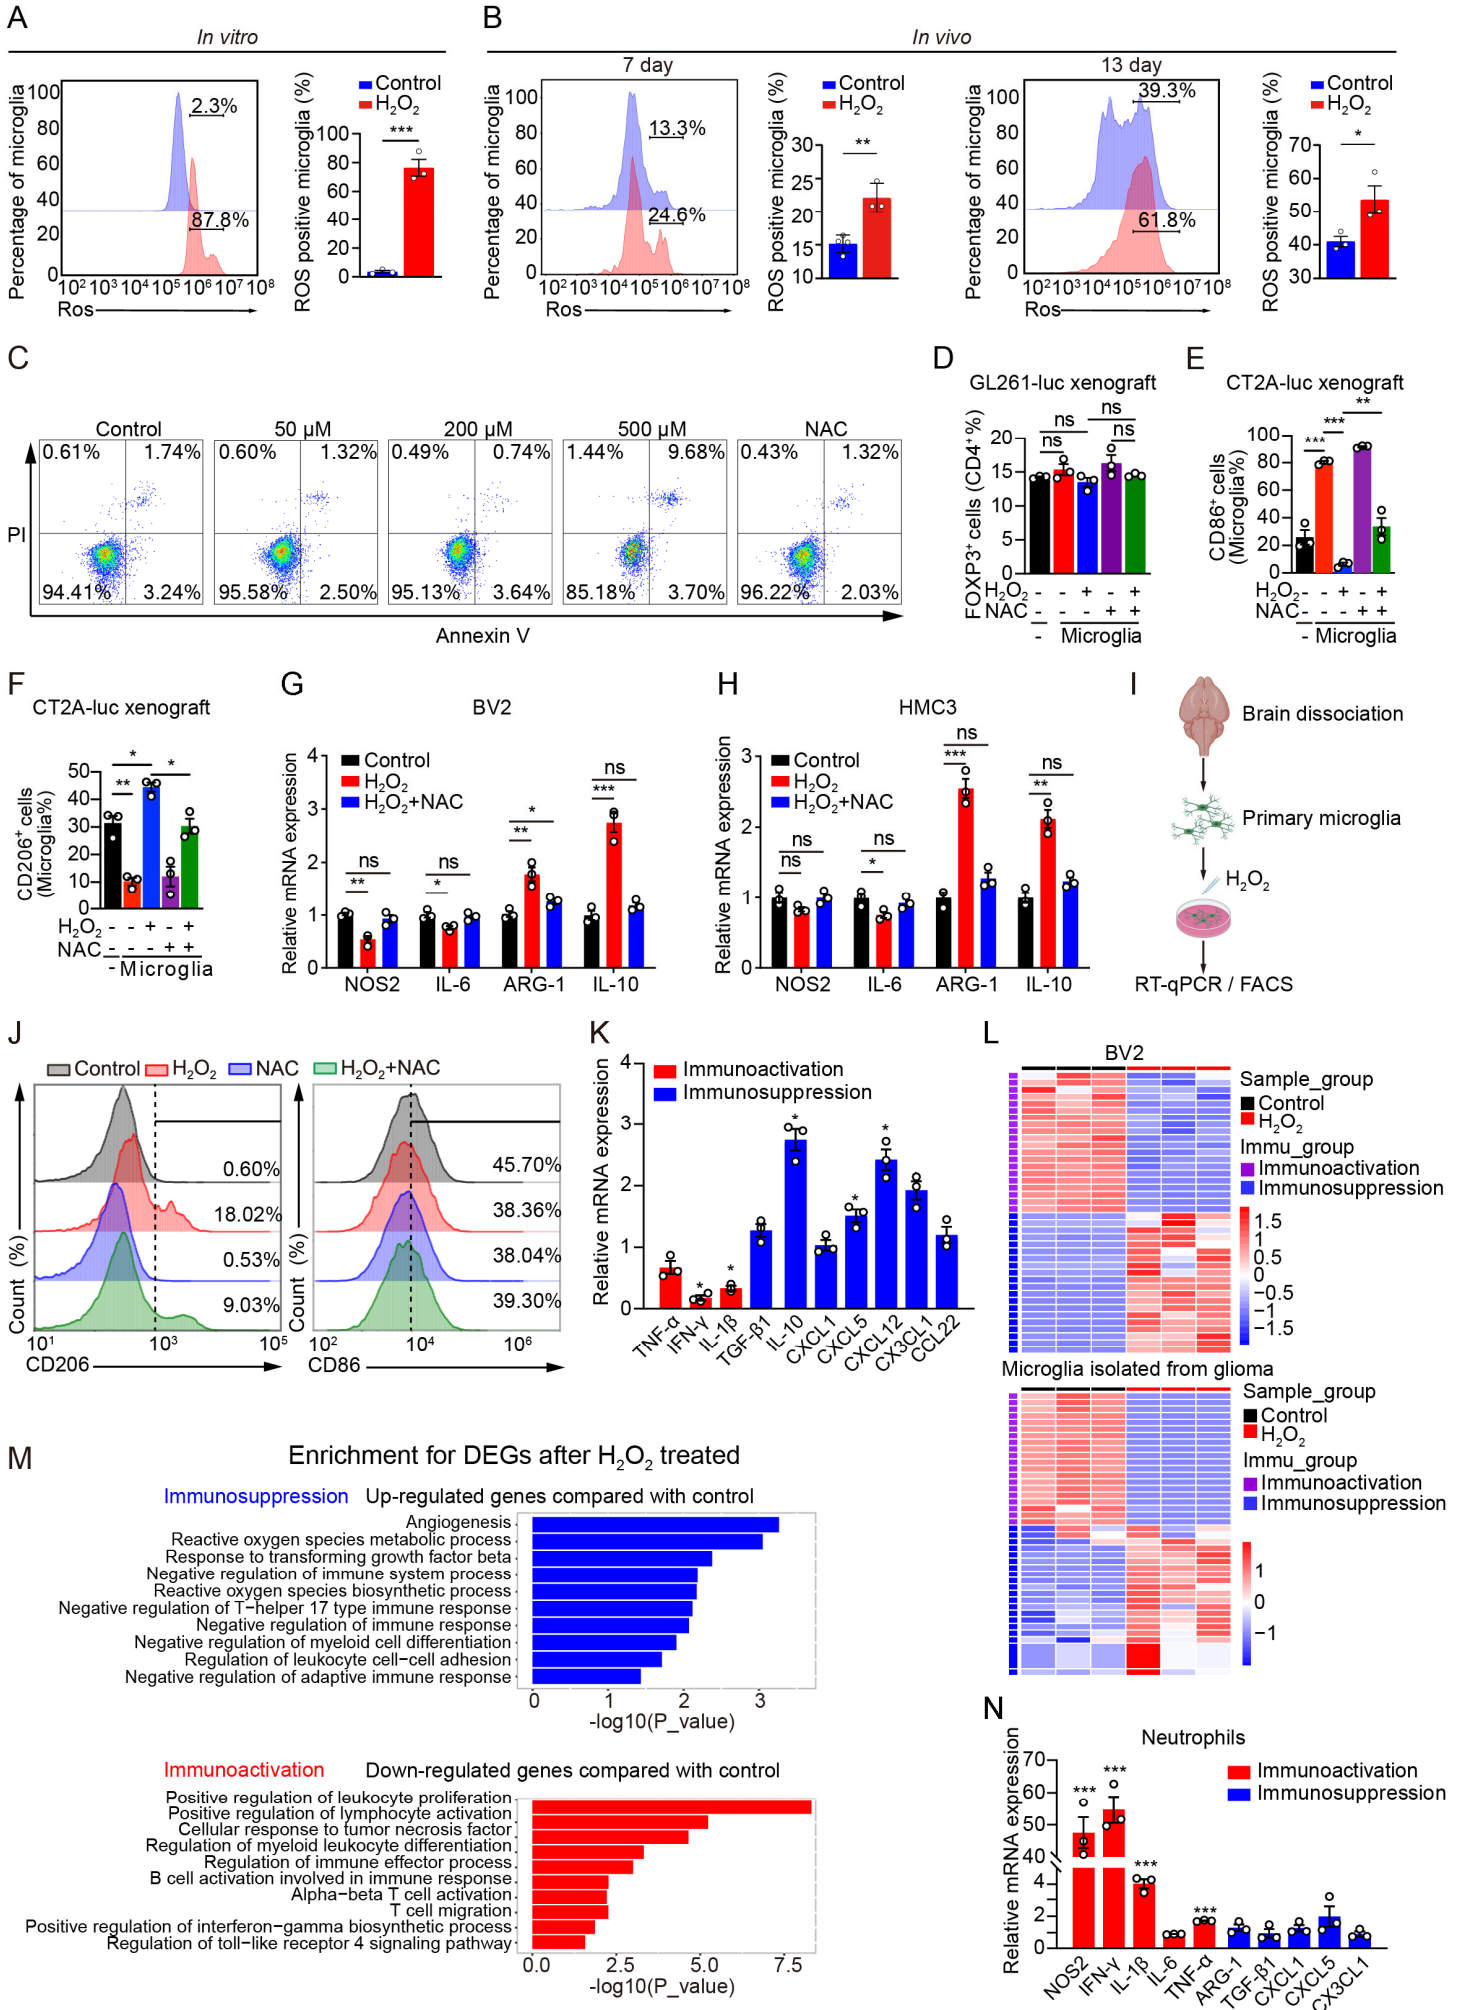

**Supplementary Figure S2. Oxidative stress in microglia promotes the immunosuppressive functions of microglia, related to Figure 3**

(A) Analysis of ROS levels in microglia treated by H<sub>2</sub>O<sub>2</sub> (500 μM, 12h) *in vitro*.

(B) Primary microglia were pretreated by H<sub>2</sub>O<sub>2</sub> (500 μM) for 12 hours. Glioma cells (CT2A-luc, 2×10<sup>4</sup> cells) incubated with conditional medium of pretreated primary microglia cells for 12 hours. Treated glioma cells and treated primary microglia (1:1) were inoculated together into the frontal region of cerebral cortex. Microglia was isolated from glioma tissues by FACS sorting at day 7 and day 13, respectively (B). FITC signals represent ROS production.

(C) Apoptosis assay of microglia treated by H<sub>2</sub>O<sub>2</sub> (50, 200 and 500 μM; 12h) or NAC (5 mM; 12h) using flow cytometry after staining with FITC-annexin V/propidium iodide.

(D) Flow cytometry analysis of FOXP3 in CD4<sup>+</sup> T cells of glioma tissue in GL261-luc glioma-bearing mice.

(E, F) Flow cytometry analysis of CD86 (E) and CD206 (F) in microglia (CD11b<sup>+</sup>CD45<sup>low</sup>) of glioma tissue from CT2A-luc glioma-bearing mice.

(G-H) Expression levels of immune activation marker (*NOS2* and *IL-6*) and immunosuppression marker (*ARG-1* and *IL-10*) in BV2 cells (G) and HMC3 cells (H) after H<sub>2</sub>O<sub>2</sub> (500 μM) treatment in absence or presence of NAC (5 mM).

(I-J) Primary microglia isolated from normal brain were treated by H<sub>2</sub>O<sub>2</sub> (500 μM) in absence or presence of NAC (5 mM) for 12 hours (I). Flow cytometry analysis to test CD206 and CD86 levels of treated primary microglia in respective group (J).

(K) Relative expression levels of immune activation genes (*TNF-α*, *IFN-γ* and *IL-1β*) and immune suppression genes (*TGF-β1*, *IL-10*, *CXCL1*, *CXCL5*, *CXCL12*, *CX3CL1* and *CCL22*) in primary microglia after H<sub>2</sub>O<sub>2</sub> (500 μM) treatment.

(L) Heatmap of immune activation and immune suppression genes in H<sub>2</sub>O<sub>2</sub>-pretreated BV2 cells (above) and H<sub>2</sub>O<sub>2</sub>-pretreated primary microglia isolated from glioma bearing mice (below).

(M) GO analysis of DEGs in BV2 cells treated by H<sub>2</sub>O<sub>2</sub> (500 μM). The enriched GO terms were listed in terms for immune activation (red, down-regulated genes) and immune suppression (blue, up-regulated genes) based on p values.

(N) Relative expression levels of immune activation genes (*NOS2*, *IFN- $\gamma$* , *IL-1 $\beta$* , *IL-6*, and *TNF- $\alpha$* ) and immune suppression genes (*ARG-1*, *TGF- $\beta$ 1*, *CXCL1*, *CXCL5*, and *CX3CL1*) in primary neutrophils after H<sub>2</sub>O<sub>2</sub> (500  $\mu$ M) treatment.

Data are shown as mean  $\pm$  SEM. In (D), (E) and (F) P value was calculated using one-way ANOVA analysis. In (A), (B), (G), (H), (K) and (N), P value was calculated using the two-tailed Student's *t* test. \**p* < 0.05, \*\**p* < 0.01, \*\*\**p* < 0.001.
